# Supplementary material for: Genomic Analyses Reveal Demographic History and Temperate Adaptation of the Newly Discovered Honey Bee Subspecies Apis mellifera sinisxinyuan n. ssp
Source: PubMed Central journal article supplement — Mol Biol Evol. 2016 Jan 27;33(5):1337–48. doi: 10.1093/molbev/msw017 (PMC4839221; doi:10.1093/molbev/msw017), 2016-01-27
Supplement: supp_msw017_Sinisxinyuan_supplementary.pdf [file supp_msw017_Sinisxinyuan_supplementary.pdf]

# 1 Supplementary Materials

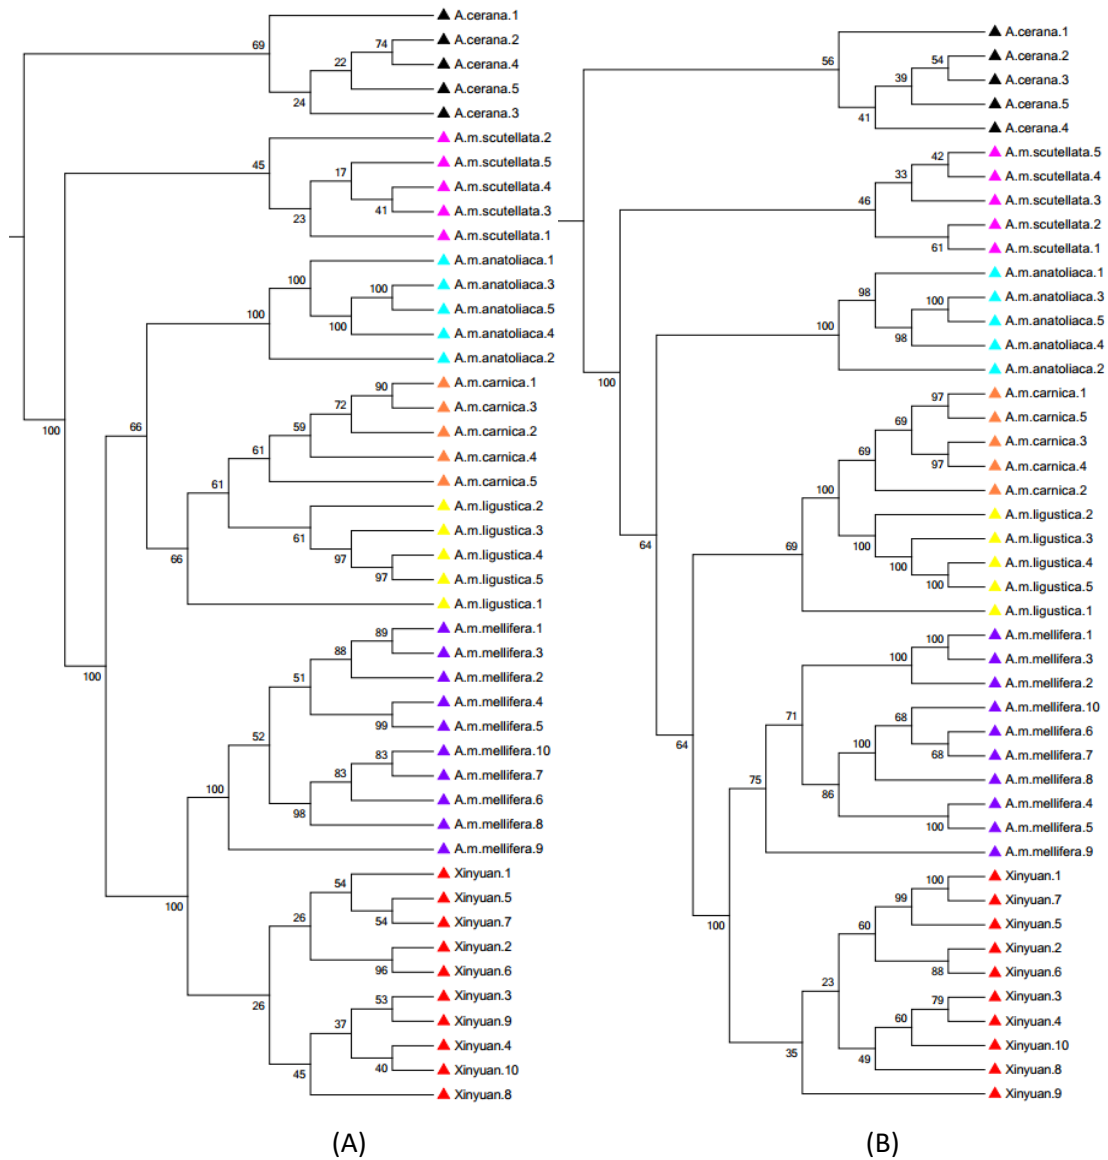

2

3

4 **Supplementary Fig. 1.** The neighbor joining trees derived from 100 bootstrap replicates  
 5 based on the distance of all individuals calculated using SNPs from gene (A) and non-gene  
 6 regions (B). The trees show similar topologies.

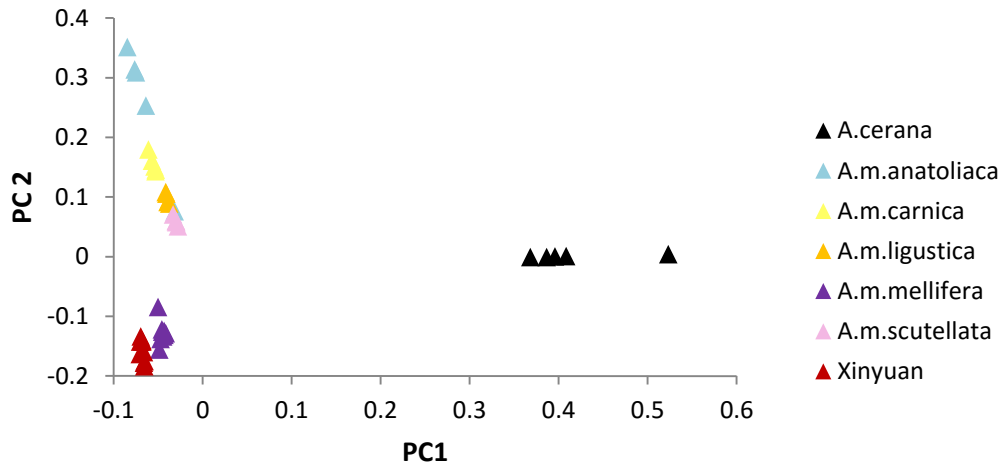

7

8

(A)

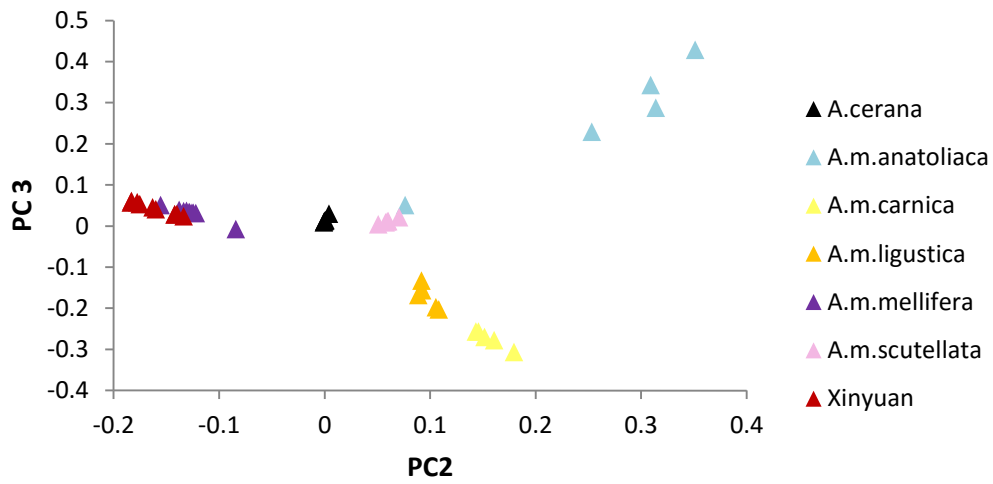

9

10

(B)

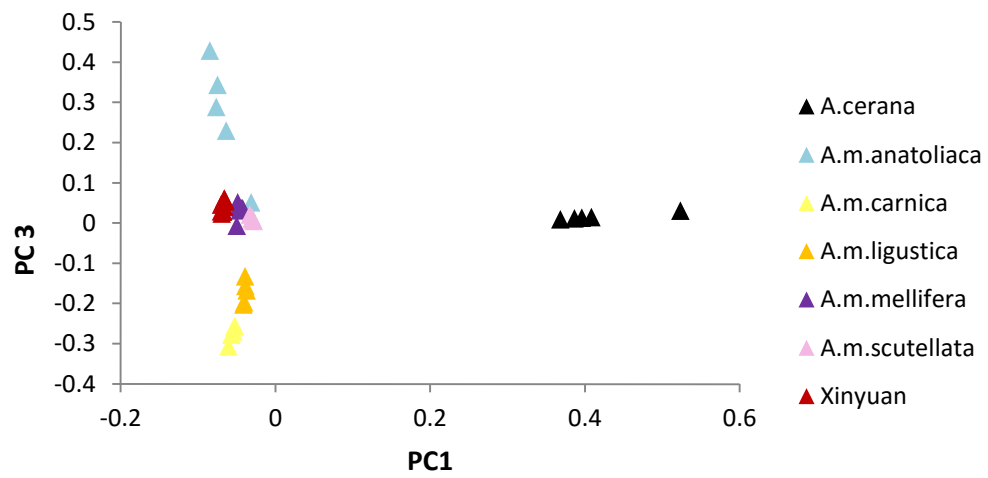

11

12

(C)

13 **Supplementary Fig. 2.** Principal component analysis (PCA) plot of (A) the first two  
14 components (PC1 and PC2); (B) PC1 and PC3; (C) PC2 and PC3. The points of Xinyuan bees  
15 (*A. m. sinisxinyuan*) are in close proximity to that of the *A. m. mellifera* individuals in the  
16 three figures.  
17

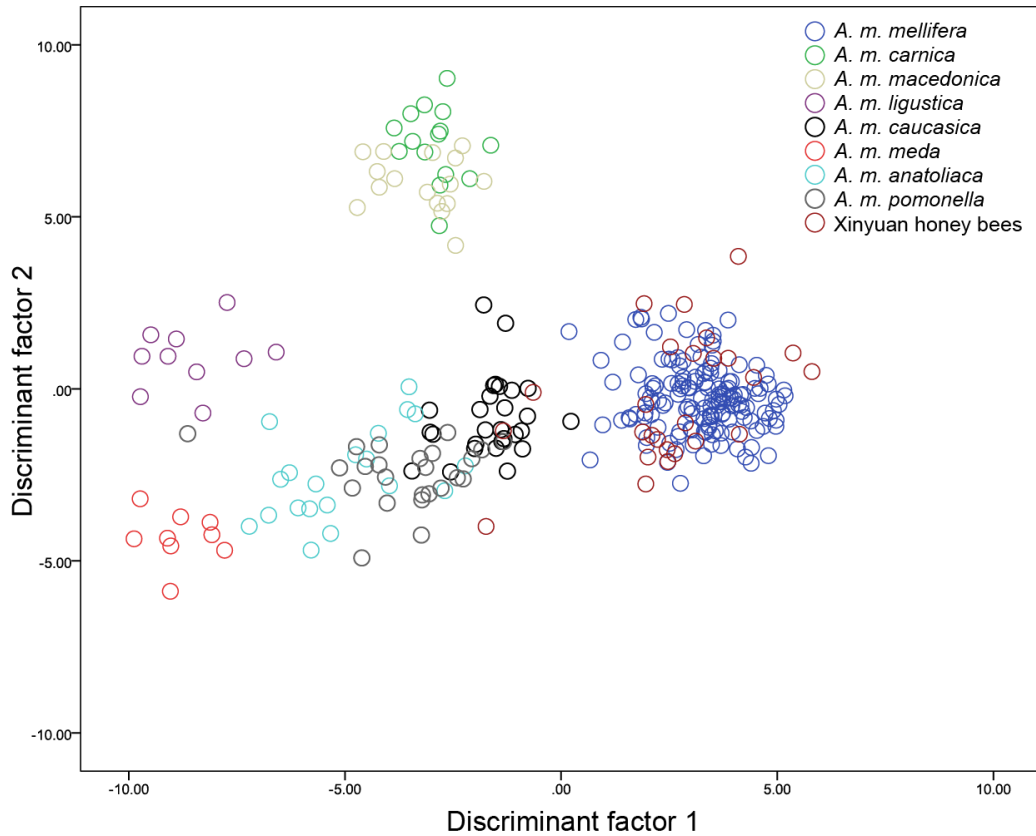

18

19

(A)

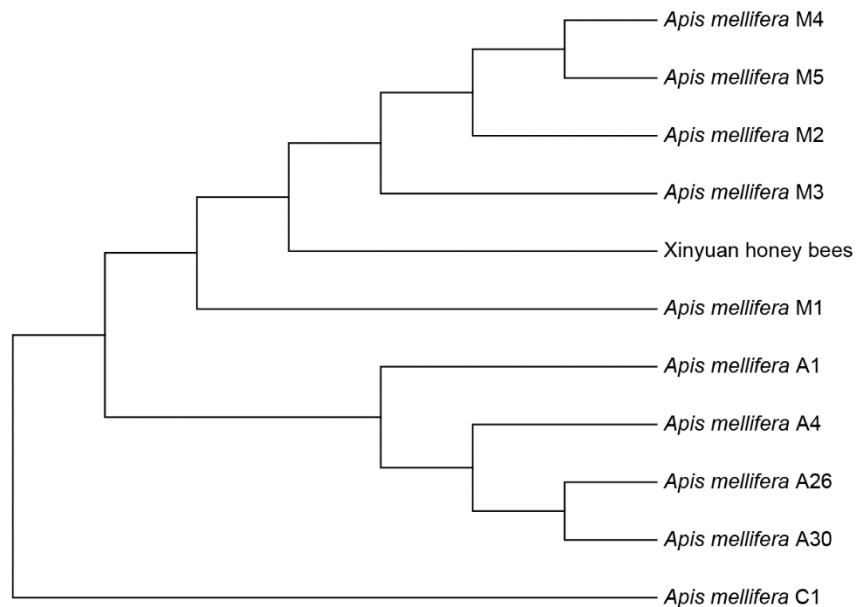

20

21

(B)

22 **Supplementary Fig. 3.** Taxonomic status of the Xinyuan honey bees. (A) Principle  
 23 component analysis of the Xinyuan honey bees and subspecies from the C-, O- and  
 24 A-lineages. Factor 1 is plotted against factor 2. Each symbol represents one colony sample. (B)  
 25 Phylogenetic tree of the mitochondrial DNA fragment (tRNA ILE and part of the ND2 gene).

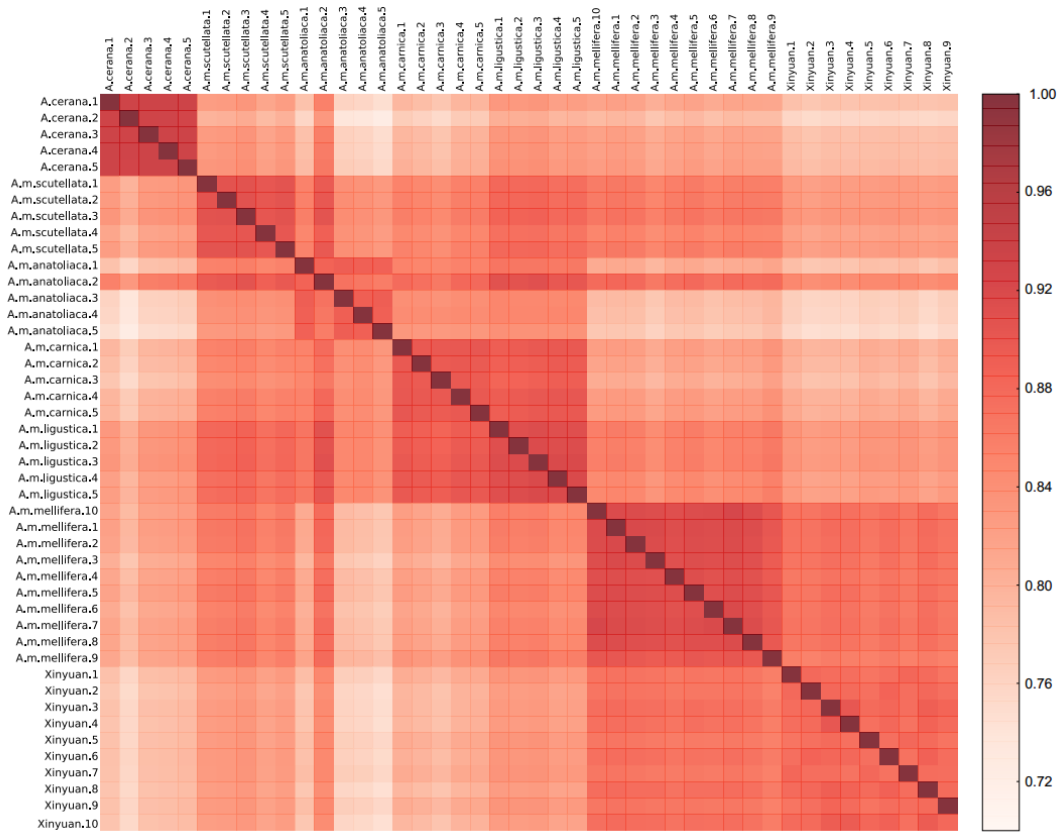

27

28 **Supplementary Fig. 4.** The similarity score of the individuals in pairwise comparisons. Heat  
 29 map colors indicate identity scores (IS). The IS of each pair of individuals within group are  
 30 lower than between groups. IS are lower between *A. m. carnica* and *A. m. ligustica* than  
 31 between Xinyuan bees (*A. m. sinisxinyuan*) and *A. m. mellifera*.

32

33

34

35

36

37

## Supplementary Tables

**Supplementary Table 1.** Statistics of genomic sequencing of Xinyuan bees (*A. m. sinisxinyuan*).

| Sample  | Individual ID | Raw reads  | Raw data (bp) | Effective Rate(%) | Clean reads | Clean Data (bp) | Proportion of Q20 (%) | Proportion of Q30 (%) | Proportion of GC (%) |
|---------|---------------|------------|---------------|-------------------|-------------|-----------------|-----------------------|-----------------------|----------------------|
| Xinyuan | Xinyuan.1     | 16,412,010 | 1,641,201,000 | 94.48             | 15,506,452  | 1,550,645,200   | 96.15                 | 89.69                 | 35.83                |
|         | Xinyuan.2     | 25,315,236 | 2,531,523,600 | 94.32             | 23,877,762  | 2,387,776,200   | 96.28                 | 90.01                 | 34.86                |
|         | Xinyuan.3     | 18,409,458 | 1,840,945,800 | 95.02             | 17,492,766  | 1,749,276,600   | 96.45                 | 90.36                 | 34.93                |
|         | Xinyuan.4     | 17,555,088 | 1,755,508,800 | 94.84             | 16,648,888  | 1,664,888,800   | 96.47                 | 90.32                 | 35.52                |
|         | Xinyuan.5     | 21,073,228 | 2,107,322,800 | 93.90             | 19,788,184  | 1,978,818,400   | 96.14                 | 89.68                 | 35.64                |
|         | Xinyuan.6     | 16,594,726 | 1,659,472,600 | 93.44             | 15,505,778  | 1,550,577,800   | 95.99                 | 89.38                 | 35.89                |
|         | Xinyuan.7     | 18,646,258 | 1,864,625,800 | 93.21             | 17,380,082  | 1,738,008,200   | 95.84                 | 89.08                 | 35.39                |
|         | Xinyuan.8     | 18,951,110 | 1,895,111,000 | 93.97             | 17,808,028  | 1,780,802,800   | 96.02                 | 89.46                 | 35.14                |
|         | Xinyuan.9     | 18,102,432 | 1,810,243,200 | 91.39             | 16,544,256  | 1,654,425,600   | 95.87                 | 89.57                 | 35.38                |
|         | Xinyuan.10    | 20,076,588 | 2,007,658,800 | 91.36             | 18,340,974  | 1,834,097,400   | 95.95                 | 89.77                 | 34.73                |

47 **Supplementary Table 2.** Information for honey bee populations included in the analyses.

| <b>Population</b>                          | <b>Source of data</b> | <b>Number of individuals</b> | <b>Lineage</b> |
|--------------------------------------------|-----------------------|------------------------------|----------------|
| Xinyuan bees ( <i>A. m. sinisxinyuan</i> ) | This study            | 10                           | M              |
| <i>A. m. mellifera</i>                     | Download from NCBI    | 10                           | M              |
| <i>A. m. scutellata</i>                    | Download from NCBI    | 5                            | A              |
| <i>A. m. ligustica</i>                     | Download from NCBI    | 5                            | C              |
| <i>A. m. carnica</i>                       | Download from NCBI    | 5                            | C              |
| <i>A. m. anatoliaca</i>                    | Download from NCBI    | 5                            | O              |
| <i>A. cerana</i>                           | Download from NCBI    | 5                            |                |

48

49 **Supplementary Table 3.** Summary of mapping and coverage rate of Xinyuan bees (*A. m. sinisxinyuan*).

| <b>Sample</b> | <b>clean bases(bp)</b> | <b>mapping rate</b> | <b>mismatch rate</b> | <b>Average depth</b> | <b>Coverage 1X</b> |
|---------------|------------------------|---------------------|----------------------|----------------------|--------------------|
| Xinyuan.1     | 1,550,645,200          | 97.87%              | 1.77%                | 7.56                 | 86.78%             |
| Xinyuan.2     | 2,387,776,200          | 97.61%              | 1.76%                | 10.15                | 92.62%             |
| Xinyuan.3     | 1,749,276,600          | 97.89%              | 1.78%                | 7.80                 | 90.84%             |
| Xinyuan.4     | 1,664,888,800          | 96.87%              | 1.78%                | 7.55                 | 89.79%             |
| Xinyuan.5     | 1,978,818,400          | 97.47%              | 1.76%                | 8.75                 | 91.20%             |
| Xinyuan.6     | 1,550,577,800          | 97.55%              | 1.79%                | 7.34                 | 87.79%             |
| Xinyuan.7     | 1,738,008,200          | 97.78%              | 1.76%                | 7.95                 | 89.86%             |
| Xinyuan.8     | 1,780,802,800          | 97.57%              | 1.81%                | 8.01                 | 90.10%             |
| Xinyuan.9     | 1,654,425,600          | 97.62%              | 1.79%                | 7.61                 | 88.87%             |
| Xinyuan.10    | 1,834,097,400          | 97.63%              | 1.83%                | 8.11                 | 90.79%             |

**Supplementary Table 4.** The functional annotation statistics of SNP in bees by ANNOVAR.

| Sample           | Exonic    |           |            |                |         | Intronic | Splicing | Upstream | Downstream | upstream/downstream | Intergenic | ts      | tv    | ts/tv | Het rate (%) | Total |
|------------------|-----------|-----------|------------|----------------|---------|----------|----------|----------|------------|---------------------|------------|---------|-------|-------|--------------|-------|
|                  | Stop gain | Stop loss | Synonymous | Non-synonymous |         |          |          |          |            |                     |            |         |       |       |              |       |
| A.cerana.1       | 64        | 8         | 98,974     | 25,070         | 213,096 | 55       | 17,749   | 13,143   | 1,915      | 191,709             | 455,348    | 113,497 | 4.011 | 0.056 | 568,845      |       |
| A.cerana.2       | 95        | 7         | 130,154    | 34,570         | 296,706 | 83       | 24,507   | 18,756   | 2,773      | 264,336             | 625,453    | 155,675 | 4.017 | 0.088 | 781,128      |       |
| A.cerana.3       | 71        | 6         | 94,813     | 23,949         | 203,588 | 59       | 17,118   | 13,065   | 1,964      | 182,572             | 436,301    | 107,600 | 4.054 | 0.054 | 543,901      |       |
| A.cerana.4       | 76        | 3         | 91,270     | 22,938         | 192,595 | 59       | 15,979   | 11,909   | 1,745      | 174,042             | 414,025    | 102,905 | 4.023 | 0.05  | 516,930      |       |
| A.cerana.5       | 68        | 6         | 86,468     | 21,474         | 179,784 | 46       | 15,131   | 11,066   | 1,775      | 162,745             | 388,207    | 96,343  | 4.029 | 0.043 | 484,550      |       |
| A.m.scutellata.1 | 45        | 6         | 23,564     | 6,613          | 260,043 | 36       | 9,524    | 7,687    | 899        | 222,004             | 444,164    | 87,994  | 5.047 | 0.787 | 532,158      |       |
| A.m.scutellata.2 | 54        | 1         | 21,373     | 6,242          | 238,125 | 35       | 8,680    | 7,514    | 845        | 205,154             | 408,265    | 81,382  | 5.016 | 0.7   | 489,647      |       |
| A.m.scutellata.3 | 31        | 3         | 20,167     | 5,651          | 213,003 | 32       | 7,746    | 6,529    | 701        | 182,676             | 365,587    | 72,533  | 5.04  | 0.594 | 438,120      |       |
| A.m.scutellata.4 | 41        | 8         | 25,996     | 7,312          | 301,805 | 36       | 11,002   | 9,233    | 1,072      | 258,348             | 514,722    | 102,143 | 5.039 | 0.964 | 616,865      |       |
| A.m.scutellata.5 | 49        | 5         | 23,209     | 6,539          | 252,795 | 33       | 9,064    | 7,566    | 845        | 216,039             | 432,031    | 85,882  | 5.03  | 0.76  | 517,913      |       |
| A.m.anatoliaca.1 | 37        | 2         | 15,981     | 5,460          | 217,440 | 33       | 7,673    | 6,618    | 756        | 185,101             | 370,202    | 70,116  | 5.279 | 0.518 | 440,318      |       |
| A.m.anatoliaca.2 | 4         | 1         | 3,951      | 1,269          | 42,212  | 7        | 1,603    | 1,340    | 133        | 37,163              | 74,079     | 13,885  | 5.335 | 0.036 | 87,964       |       |
| A.m.anatoliaca.3 | 32        | 3         | 20,496     | 6,891          | 283,136 | 33       | 9,825    | 8,382    | 923        | 241,565             | 480,927    | 91,816  | 5.237 | 0.738 | 572,743      |       |
| A.m.anatoliaca.4 | 50        | 5         | 20,962     | 7,059          | 287,251 | 41       | 9,974    | 8,523    | 944        | 244,509             | 488,085    | 92,719  | 5.264 | 0.872 | 580,804      |       |
| A.m.anatoliaca.5 | 54        | 5         | 23,471     | 7,893          | 329,853 | 39       | 11,236   | 9,482    | 1,028      | 280,644             | 559,063    | 106,297 | 5.259 | 0.985 | 665,360      |       |
| A.m.carnica.1    | 31        | 1         | 12,105     | 4,277          | 156,896 | 23       | 5,375    | 4,664    | 505        | 133,699             | 266,849    | 51,795  | 5.152 | 0.423 | 318,644      |       |



---

|                  |    |    |        |        |         |    |        |        |       |         |           |         |       |       |           |
|------------------|----|----|--------|--------|---------|----|--------|--------|-------|---------|-----------|---------|-------|-------|-----------|
| A.m.carnica.2    | 32 | 6  | 12,943 | 4,654  | 173,619 | 29 | 5,898  | 5,136  | 530   | 149,554 | 296,269   | 57,326  | 5.168 | 0.492 | 353,595   |
| A.m.carnica.3    | 38 | 4  | 13,701 | 5,089  | 191,291 | 38 | 6,658  | 5,781  | 692   | 166,595 | 327,125   | 64,000  | 5.111 | 0.547 | 391,125   |
| A.m.carnica.4    | 32 | 4  | 11,390 | 4,070  | 146,516 | 23 | 5,171  | 4,317  | 512   | 127,264 | 251,428   | 48,857  | 5.146 | 0.373 | 300,285   |
| A.m.carnica.5    | 24 | 1  | 12,039 | 4,094  | 151,830 | 22 | 5,354  | 4,624  | 543   | 130,651 | 259,700   | 50,487  | 5.143 | 0.401 | 310,187   |
| A.m.ligustica.1  | 18 | 0  | 8,985  | 2,923  | 102,775 | 11 | 3,494  | 2,939  | 306   | 90,198  | 177,707   | 34,704  | 5.12  | 0.276 | 212,411   |
| A.m.ligustica.2  | 19 | 1  | 8,886  | 2,823  | 99,232  | 13 | 3,465  | 3,003  | 323   | 87,167  | 172,212   | 33,423  | 5.152 | 0.261 | 205,635   |
| A.m.ligustica.3  | 14 | 0  | 7,736  | 2,416  | 85,958  | 16 | 3,196  | 2,634  | 295   | 74,101  | 148,322   | 28,745  | 5.159 | 0.174 | 177,067   |
| A.m.ligustica.4  | 17 | 1  | 9,309  | 3,121  | 104,633 | 16 | 3,894  | 3,163  | 398   | 91,590  | 181,442   | 35,511  | 5.109 | 0.212 | 216,953   |
| A.m.ligustica.5  | 18 | 0  | 9,155  | 3,002  | 102,357 | 14 | 3,797  | 3,061  | 337   | 88,805  | 177,110   | 34,183  | 5.181 | 0.201 | 211,293   |
| A.m.mellifera.10 | 30 | 4  | 20,261 | 6,302  | 247,197 | 35 | 9,072  | 7,730  | 823   | 209,064 | 419,871   | 82,250  | 5.104 | 0.336 | 502,121   |
| A.m.mellifera.1  | 40 | 6  | 19,366 | 6,000  | 236,133 | 28 | 8,631  | 7,292  | 776   | 199,416 | 400,679   | 78,592  | 5.098 | 0.305 | 479,271   |
| A.m.mellifera.2  | 34 | 4  | 20,229 | 6,384  | 249,469 | 36 | 9,127  | 7,806  | 870   | 209,924 | 423,030   | 82,483  | 5.128 | 0.321 | 505,513   |
| A.m.mellifera.3  | 40 | 7  | 24,144 | 7,952  | 328,101 | 45 | 11,970 | 10,342 | 1,130 | 277,654 | 554,775   | 108,573 | 5.109 | 0.532 | 663,348   |
| A.m.mellifera.4  | 40 | 9  | 24,182 | 8,041  | 311,323 | 42 | 11,355 | 9,613  | 1,010 | 264,398 | 528,597   | 103,372 | 5.113 | 0.89  | 631,969   |
| A.m.mellifera.5  | 36 | 3  | 20,067 | 6,380  | 248,559 | 26 | 8,998  | 7,757  | 870   | 209,701 | 421,530   | 82,436  | 5.113 | 0.367 | 503,966   |
| A.m.mellifera.6  | 39 | 7  | 21,943 | 7,050  | 290,981 | 31 | 10,527 | 9,044  | 986   | 245,366 | 491,729   | 96,049  | 5.119 | 0.469 | 587,778   |
| A.m.mellifera.7  | 32 | 5  | 21,012 | 6,634  | 254,509 | 33 | 9,299  | 7,943  | 810   | 214,661 | 431,995   | 84,679  | 5.101 | 0.367 | 516,674   |
| A.m.mellifera.8  | 32 | 6  | 21,404 | 6,741  | 257,273 | 31 | 9,416  | 8,048  | 866   | 214,835 | 435,329   | 85,159  | 5.111 | 0.404 | 520,488   |
| A.m.mellifera.9  | 32 | 6  | 20,992 | 6,619  | 268,010 | 28 | 9,543  | 8,446  | 902   | 227,173 | 454,623   | 88,791  | 5.12  | 0.884 | 543,414   |
| Xinyuan.1        | 42 | 12 | 31,047 | 10,107 | 580,211 | 50 | 20,332 | 17,815 | 1,974 | 499,498 | 966,597   | 196,940 | 4.908 | 1.856 | 1,163,537 |
| Xinyuan.2        | 48 | 14 | 33,807 | 11,409 | 676,190 | 49 | 25,428 | 21,792 | 2,659 | 597,801 | 1,137,678 | 234,198 | 4.857 | 2.238 | 1,371,876 |
| Xinyuan.3        | 45 | 14 | 31,618 | 10,392 | 617,408 | 52 | 22,682 | 19,890 | 2,355 | 538,025 | 1,032,820 | 212,225 | 4.866 | 1.677 | 1,245,045 |

---

---

|            |    |    |        |        |         |    |        |        |       |         |           |         |       |       |           |
|------------|----|----|--------|--------|---------|----|--------|--------|-------|---------|-----------|---------|-------|-------|-----------|
| Xinyuan.4  | 49 | 12 | 30,322 | 9,989  | 590,522 | 49 | 21,221 | 18,521 | 2,179 | 514,427 | 986,704   | 203,022 | 4.86  | 1.394 | 1,189,726 |
| Xinyuan.5  | 41 | 14 | 32,840 | 10,918 | 639,471 | 58 | 23,475 | 19,960 | 2,327 | 564,623 | 1,075,895 | 220,497 | 4.879 | 2.344 | 1,296,392 |
| Xinyuan.6  | 38 | 9  | 30,149 | 9,931  | 578,052 | 47 | 20,231 | 17,395 | 1,984 | 503,099 | 965,458   | 197,860 | 4.879 | 1.623 | 1,163,318 |
| Xinyuan.7  | 36 | 10 | 31,376 | 10,322 | 610,683 | 54 | 21,864 | 18,763 | 2,222 | 532,787 | 1,020,764 | 209,900 | 4.863 | 2.103 | 1,230,664 |
| Xinyuan.8  | 52 | 11 | 31,281 | 10,572 | 605,959 | 51 | 22,527 | 19,249 | 2,308 | 536,703 | 1,021,337 | 209,903 | 4.865 | 1.46  | 1,231,240 |
| Xinyuan.9  | 47 | 12 | 30,902 | 10,398 | 594,356 | 44 | 21,352 | 18,605 | 2,197 | 521,536 | 997,394   | 204,584 | 4.875 | 1.892 | 1,201,978 |
| Xinyuan.10 | 45 | 12 | 31,836 | 10,732 | 625,093 | 42 | 23,202 | 20,189 | 2,395 | 550,958 | 1,051,068 | 216,006 | 4.865 | 1.643 | 1,267,074 |

---

51

52

53

54

55

56

57

58

59

60

61

62

63

64

65

**Supplementary Table 5.** The functional annotation statistics of indel in bees by ANNOVAR.

| Sample           | Exonic               |              |                                |                                 |                                        |                                 | Intronic | Spli<br>cin<br>g | Upstrea<br>m | Upstream/<br>Downstre<br>am | Intergenic | Insertio<br>n | Deletion | Het<br>Rate<br>(%) | Total   |
|------------------|----------------------|--------------|--------------------------------|---------------------------------|----------------------------------------|---------------------------------|----------|------------------|--------------|-----------------------------|------------|---------------|----------|--------------------|---------|
|                  | Sto<br>p<br>gai<br>n | Stop<br>loss | Frame<br>shift<br>deletio<br>n | Frame<br>shift<br>inserti<br>on | Non-fr<br>ameshi<br>ft<br>deletio<br>n | Non-fra<br>meshift<br>insertion |          |                  |              |                             |            |               |          |                    |         |
| A.cerana.1       | 3                    | 0            | 93                             | 39                              | 403                                    | 214                             | 34,958   | 57               | 1,834        | 213                         | 30,305     | 12,261        | 58,499   | 0.004              | 70,760  |
| A.cerana.2       | 7                    | 3            | 137                            | 77                              | 583                                    | 317                             | 49,953   | 80               | 2,716        | 320                         | 43,428     | 17,971        | 83,574   | 0.007              | 101,545 |
| A.cerana.3       | 3                    | 1            | 91                             | 45                              | 408                                    | 201                             | 33,123   | 46               | 1,806        | 205                         | 28,653     | 11,720        | 55,505   | 0.004              | 67,225  |
| A.cerana.4       | 7                    | 2            | 102                            | 38                              | 337                                    | 191                             | 31,454   | 45               | 1,605        | 186                         | 27,675     | 11,045        | 52,944   | 0.003              | 63,989  |
| A.cerana.5       | 4                    | 3            | 88                             | 29                              | 335                                    | 196                             | 29,194   | 44               | 1,603        | 181                         | 25,572     | 10,215        | 49,246   | 0.003              | 59,461  |
| A.m.scutellata.1 | 6                    | 3            | 90                             | 56                              | 131                                    | 123                             | 38,829   | 25               | 1,330        | 129                         | 31,059     | 33,708        | 39,635   | 0.095              | 73,343  |
| A.m.scutellata.2 | 3                    | 1            | 91                             | 55                              | 137                                    | 107                             | 34,662   | 27               | 1,247        | 117                         | 27,936     | 30,484        | 35,305   | 0.081              | 65,789  |
| A.m.scutellata.3 | 2                    | 1            | 97                             | 52                              | 99                                     | 106                             | 31,172   | 18               | 1,089        | 96                          | 25,142     | 27,413        | 31,729   | 0.068              | 59,142  |
| A.m.scutellata.4 | 2                    | 1            | 113                            | 82                              | 138                                    | 132                             | 45,405   | 43               | 1,612        | 165                         | 36,367     | 39,979        | 45,957   | 0.117              | 85,936  |
| A.m.scutellata.5 | 4                    | 2            | 66                             | 69                              | 96                                     | 114                             | 37,442   | 27               | 1,280        | 116                         | 29,966     | 32,701        | 37,935   | 0.09               | 70,636  |
| A.m.anatoliaca.1 | 5                    | 3            | 55                             | 62                              | 124                                    | 77                              | 32,369   | 26               | 1,157        | 114                         | 26,145     | 26,254        | 35,177   | 0.055              | 61,431  |
| A.m.anatoliaca.2 | 1                    | 1            | 16                             | 10                              | 17                                     | 15                              | 5,661    | 2                | 193          | 24                          | 4,731      | 4,779         | 6,119    | 0.003              | 10,898  |
| A.m.anatoliaca.3 | 7                    | 1            | 92                             | 79                              | 153                                    | 107                             | 45,055   | 31               | 1,592        | 137                         | 36,234     | 36,870        | 48,335   | 0.088              | 85,205  |
| A.m.anatoliaca.4 | 5                    | 2            | 97                             | 74                              | 154                                    | 103                             | 45,553   | 36               | 1,577        | 147                         | 36,744     | 36,866        | 49,403   | 0.104              | 86,269  |
| A.m.anatoliaca.5 | 5                    | 3            | 109                            | 96                              | 188                                    | 132                             | 54,847   | 43               | 1,869        | 167                         | 44,183     | 44,819        | 58,950   | 0.126              | 103,769 |

|                  |   |   |     |     |     |     |         |    |       |     |         |         |         |       |         |
|------------------|---|---|-----|-----|-----|-----|---------|----|-------|-----|---------|---------|---------|-------|---------|
| A.m.carnica.1    | 2 | 3 | 42  | 58  | 104 | 56  | 23,839  | 15 | 798   | 63  | 19,383  | 17,367  | 27,947  | 0.046 | 45,314  |
| A.m.carnica.2    | 6 | 2 | 51  | 58  | 111 | 53  | 26,972  | 23 | 916   | 78  | 21,813  | 19,910  | 31,231  | 0.056 | 51,141  |
| A.m.carnica.3    | 4 | 2 | 53  | 61  | 130 | 62  | 29,936  | 22 | 1,064 | 93  | 24,535  | 21,994  | 35,159  | 0.062 | 57,153  |
| A.m.carnica.4    | 3 | 1 | 55  | 45  | 90  | 39  | 22,453  | 11 | 780   | 65  | 18,252  | 16,322  | 26,379  | 0.041 | 42,701  |
| A.m.carnica.5    | 3 | 2 | 47  | 49  | 94  | 60  | 22,973  | 20 | 832   | 70  | 18,591  | 17,006  | 26,674  | 0.043 | 43,680  |
| A.m.ligustica.1  | 0 | 1 | 26  | 23  | 51  | 41  | 14,331  | 10 | 475   | 44  | 11,769  | 10,406  | 16,865  | 0.028 | 27,271  |
| A.m.ligustica.2  | 2 | 1 | 28  | 40  | 76  | 40  | 13,984  | 8  | 487   | 44  | 11,511  | 10,176  | 16,625  | 0.027 | 26,801  |
| A.m.ligustica.3  | 0 | 1 | 26  | 30  | 61  | 27  | 12,228  | 9  | 494   | 41  | 9,981   | 8,435   | 14,945  | 0.018 | 23,380  |
| A.m.ligustica.4  | 4 | 1 | 67  | 37  | 74  | 35  | 15,619  | 10 | 564   | 57  | 12,890  | 10,777  | 19,240  | 0.024 | 30,017  |
| A.m.ligustica.5  | 1 | 1 | 43  | 39  | 69  | 42  | 15,211  | 16 | 563   | 51  | 12,504  | 10,538  | 18,618  | 0.022 | 29,156  |
| A.m.mellifera.10 | 3 | 3 | 50  | 67  | 130 | 83  | 38,483  | 26 | 1,318 | 129 | 30,587  | 32,359  | 40,000  | 0.036 | 72,359  |
| A.m.mellifera.1  | 1 | 3 | 59  | 65  | 122 | 68  | 36,525  | 30 | 1,278 | 109 | 28,882  | 30,621  | 37,960  | 0.032 | 68,581  |
| A.m.mellifera.2  | 1 | 3 | 65  | 68  | 124 | 87  | 39,134  | 26 | 1,363 | 114 | 31,015  | 32,993  | 40,577  | 0.034 | 73,570  |
| A.m.mellifera.3  | 5 | 4 | 88  | 107 | 173 | 116 | 52,881  | 38 | 1,865 | 181 | 42,058  | 44,570  | 55,015  | 0.061 | 99,585  |
| A.m.mellifera.4  | 1 | 3 | 99  | 93  | 191 | 131 | 51,756  | 39 | 1,811 | 144 | 41,753  | 43,857  | 54,158  | 0.133 | 98,015  |
| A.m.mellifera.5  | 3 | 3 | 77  | 64  | 137 | 75  | 38,959  | 32 | 1,347 | 120 | 30,733  | 32,690  | 40,358  | 0.039 | 73,048  |
| A.m.mellifera.6  | 3 | 4 | 62  | 90  | 156 | 106 | 45,606  | 42 | 1,554 | 137 | 36,213  | 38,343  | 47,420  | 0.051 | 85,763  |
| A.m.mellifera.7  | 4 | 2 | 77  | 68  | 144 | 98  | 40,188  | 30 | 1,388 | 114 | 31,732  | 33,877  | 41,525  | 0.039 | 75,402  |
| A.m.mellifera.8  | 2 | 2 | 57  | 67  | 150 | 111 | 40,117  | 26 | 1,405 | 121 | 31,457  | 33,630  | 41,464  | 0.042 | 75,094  |
| A.m.mellifera.9  | 3 | 3 | 63  | 69  | 124 | 90  | 40,519  | 42 | 1,360 | 149 | 32,850  | 34,813  | 42,067  | 0.104 | 76,880  |
| Xinyuan.1        | 9 | 4 | 106 | 121 | 320 | 233 | 108,142 | 57 | 3,692 | 356 | 87,466  | 93,227  | 111,572 | 0.251 | 204,799 |
| Xinyuan.2        | 8 | 5 | 122 | 142 | 382 | 258 | 133,542 | 77 | 4,985 | 521 | 110,176 | 116,912 | 139,046 | 0.326 | 255,958 |

|            |   |   |     |     |     |     |         |    |       |     |         |         |         |       |         |
|------------|---|---|-----|-----|-----|-----|---------|----|-------|-----|---------|---------|---------|-------|---------|
| Xinyuan.3  | 7 | 5 | 115 | 139 | 337 | 240 | 119,352 | 63 | 4,416 | 461 | 96,626  | 104,176 | 122,611 | 0.227 | 226,787 |
| Xinyuan.4  | 6 | 7 | 110 | 122 | 320 | 253 | 114,337 | 59 | 4,079 | 402 | 92,430  | 99,475  | 117,286 | 0.182 | 216,761 |
| Xinyuan.5  | 8 | 6 | 106 | 143 | 353 | 269 | 123,558 | 67 | 4,511 | 428 | 101,013 | 107,397 | 128,110 | 0.331 | 235,507 |
| Xinyuan.6  | 9 | 4 | 99  | 133 | 300 | 226 | 108,991 | 65 | 3,835 | 344 | 88,352  | 94,561  | 112,081 | 0.218 | 206,642 |
| Xinyuan.7  | 5 | 4 | 107 | 121 | 309 | 235 | 114,750 | 65 | 4,100 | 418 | 93,925  | 99,244  | 119,415 | 0.291 | 218,659 |
| Xinyuan.8  | 4 | 5 | 107 | 134 | 323 | 231 | 118,886 | 69 | 4,414 | 453 | 96,889  | 104,171 | 122,307 | 0.197 | 226,478 |
| Xinyuan.9  | 4 | 5 | 106 | 127 | 315 | 236 | 111,974 | 69 | 3,986 | 400 | 91,594  | 97,242  | 116,084 | 0.254 | 213,326 |
| Xinyuan.10 | 7 | 6 | 107 | 135 | 296 | 247 | 121,154 | 65 | 4,507 | 455 | 99,467  | 106,315 | 125,333 | 0.22  | 231,648 |

67

68 **Supplementary Table 6.** Tracy-Widom statistics of the top ten eigenvalues from PCA analysis of 45 individuals.

| Number | Eigenvalue | TW     | <i>P-value</i> |
|--------|------------|--------|----------------|
| 1      | 10.628857  | 6.212  | 1.12E-06       |
| 2      | 9.283494   | 11.911 | 9.51E-14       |
| 3      | 3.648300   | 1.754  | 1.56E-02       |
| 4      | 3.345304   | 1.892  | 1.24E-02       |
| 5      | 3.184757   | 3.108  | 1.38E-03       |
| 6      | 2.663874   | 0.980  | 4.99E-02       |
| 7      | 2.540443   | 1.798  | 1.45E-02       |
| 8      | 2.369168   | 2.217  | 7.18E-03       |
| 9      | 2.365180   | 5.012  | 2.22E-05       |
| 10     | 1.904863   | 1.727  | 1.63E-02       |

69

70 **Supplementary Table 7.** Comparative characteristics of *A. m. sinixinyuan*, *A. m. mellifera*, *A. m. carnica*, *A. m. ligustica*, *A. m. caucasica*, and *A. m. pomonella*. Values are  
71 presented as means  $\pm$  standard deviations of samples, with each sample representing one colony. N = number of sampled colonies. Measurements of size are in units of 1:100  
72 mm; wing venation angles are in degrees. Characters of pigmentation: 0 =completely dark, 9 = completely bright (yellow). Measurements were taken according to Ruttner  
73 (1988).

|                        | <i>sinixinyuan</i><br>(N = 20) | <i>mellifera</i><br>(N = 9)   | <i>carnica</i><br>(N = 20)    | <i>ligustica</i><br>(N = 12) | <i>caucasica</i><br>(N = 12) | <i>pomonella</i><br>(N = 31) |
|------------------------|--------------------------------|-------------------------------|-------------------------------|------------------------------|------------------------------|------------------------------|
| hairlength             | 49.89 $\pm$ 2.41               | 43.47 $\pm$ 4.77              | 29.57 $\pm$ 3.74              | 27.92 $\pm$ 2.35             | 33.22 $\pm$ 1.96             | 26.85 $\pm$ 1.95             |
| proboscis              | 595.00 $\pm$ 11.02             | 607.15 $\pm$ 13.12<br>(N = 4) | 640.87 $\pm$ 7.51<br>(N = 18) | 635.94 $\pm$ 7.86            | 706.64 $\pm$ 15.06           | 641.16 $\pm$ 17.96           |
| body size              | 409.95 $\pm$ 7.19              | 463.02 $\pm$ 9.58             | 453.44 $\pm$ 6.25             | 436.93 $\pm$ 7.8             | 456.62 $\pm$ 7.76            | 449.49 $\pm$ 14.04           |
| cubital index          | 1.67 $\pm$ 0.16                | 1.82 $\pm$ 0.2                | 2.69 $\pm$ 0.18               | 2.52 $\pm$ 0.12              | 2.14 $\pm$ 0.12              | 2.24 $\pm$ 0.20              |
| sternite 6 index       | 68.96 $\pm$ 1.31               | 77.99 $\pm$ 2.92              | 83.81 $\pm$ 1.2               | 84.14 $\pm$ 1.49             | 82.14 $\pm$ 1.14             | 78.18 $\pm$ 3.03<br>(N = 29) |
| tarsus index           | 54.11 $\pm$ 1.26               | 54.86 $\pm$ 1.64              | 55.31 $\pm$ 1.37              | 55.24 $\pm$ 0.68             | 57.81 $\pm$ 0.75             | 56.78 $\pm$ 1.35             |
| pigmentation tergite 2 | 1.71 $\pm$ 1.68                | 2.1 $\pm$ 0.74                | 1.39 $\pm$ 0.95<br>(N = 15)   | 7.87 $\pm$ 0.4               | 3.92 $\pm$ 0.27              | 5.65 $\pm$ 1.12              |
| tomentum index         | 1.26 $\pm$ 0.12                | 1.63 $\pm$ 0.57               | 2.07 $\pm$ 0.26               | 2.2 $\pm$ 0.54               | 2.76 $\pm$ 0.21              | 2.05 $\pm$ 0.39              |

74

75

76

77

78

**Supplementary Table 8.** GO enrichment of the selective sweep genes in *A. m. sinixinyuan* & *A. m. mellifera* compared to *A. m. scutellata*.

| GO_accession | Description                                          | Term type | P-value  | Gene (#) |
|--------------|------------------------------------------------------|-----------|----------|----------|
| GO:0051899   | membrane depolarization                              | BP        | 9.64E-05 | 4        |
| GO:0042417   | dopamine metabolic process                           | BP        | 0.001131 | 4        |
| GO:0017150   | tRNA dihydrouridine synthase activity                | MF        | 0.001251 | 3        |
| GO:0010883   | regulation of lipid storage                          | BP        | 0.001981 | 5        |
| GO:0007629   | flight behavior                                      | BP        | 0.002020 | 5        |
| GO:0007626   | locomotory behavior                                  | BP        | 0.003594 | 13       |
| GO:0003254   | regulation of membrane depolarization                | BP        | 0.003615 | 2        |
| GO:0010644   | cell communication by electrical coupling            | BP        | 0.003615 | 2        |
| GO:0016264   | gap junction assembly                                | BP        | 0.003615 | 2        |
| GO:0005355   | glucose transmembrane transporter activity           | MF        | 0.003826 | 6        |
| GO:0015149   | hexose transmembrane transporter activity            | MF        | 0.003826 | 6        |
| GO:0045199   | maintenance of epithelial cell apical/basal polarity | BP        | 0.004169 | 2        |
| GO:0048047   | mating behavior, sex discrimination                  | BP        | 0.004309 | 2        |
| GO:0031080   | nuclear pore outer ring                              | CC        | 0.004454 | 3        |
| GO:0008280   | cohesin core heterodimer                             | CC        | 0.004633 | 2        |
| GO:0007488   | histoblast morphogenesis                             | BP        | 0.004694 | 3        |
| GO:0004617   | phosphoglycerate dehydrogenase activity              | MF        | 0.004798 | 2        |
| GO:0005921   | gap junction                                         | CC        | 0.004822 | 3        |
| GO:0030534   | adult behavior                                       | BP        | 0.004855 | 11       |
| GO:0031638   | zymogen activation                                   | BP        | 0.005234 | 2        |

80

**Supplementary Table 9.** KEGG enrichment of the selective sweep genes in *A. m. sinisxinyuan* & *A. m. mellifera* relative to *A. m. scutellata*.

| <b>ID</b> | <b>#Term</b>                                | <b>P-value</b> | <b>Gene (#)</b> |
|-----------|---------------------------------------------|----------------|-----------------|
| ame00230  | Purine metabolism                           | 0.00056654     | 13              |
| ame03013  | RNA transport                               | 0.00067975     | 13              |
| ame00511  | Other glycan degradation                    | 0.00242878     | 4               |
| ame01100  | Metabolic pathways                          | 0.00255971     | 43              |
| ame03050  | Proteasome                                  | 0.01634206     | 5               |
| ame00520  | Amino sugar and nucleotide sugar metabolism | 0.01634206     | 5               |
| ame04145  | Phagosome                                   | 0.02180289     | 6               |
| ame00900  | Terpenoid backbone biosynthesis             | 0.03462671     | 3               |
| ame03015  | mRNA surveillance pathway                   | 0.03817694     | 6               |
| ame04391  | Hippo signaling pathway - fly               | 0.03995289     | 5               |
| ame04122  | Sulfur relay system                         | 0.04380862     | 2               |
| ame00512  | Mucin type O-Glycan biosynthesis            | 0.04380862     | 2               |
| ame03450  | Non-homologous end-joining                  | 0.04380862     | 2               |

81

82

83

84

85

86

87



**Supplementary Table 10.** KEGG enrichment of the selective sweep genes in *A. m. sinisxinyuan* relative to *A. m. mellifera*.

| <b>ID</b> | <b>#Term</b>                              | <b>P-value</b> | <b>Gene (#)</b> |
|-----------|-------------------------------------------|----------------|-----------------|
| ame00983  | Drug metabolism - other enzymes           | 0.025161       | 2               |
| ame04130  | SNARE interactions in vesicular transport | 0.030699       | 2               |
| ame04391  | Hippo signaling pathway - fly             | 0.038240       | 3               |
| ame03008  | Ribosome biogenesis in eukaryotes         | 0.065188       | 3               |
| ame00740  | Riboflavin metabolism                     | 0.080605       | 1               |
| ame03030  | DNA replication                           | 0.092758       | 2               |

89 **Supplementary note**

90 **Materials and methods**

91 *Morphometric analysis*

92 Fifteen workers from each colony were dissected and analyzed for morphometric  
93 measurement according to the methods described by Ruttner et al (1988). A total of 39  
94 morphometric characters were measured, among which wing venation angles and characters  
95 of size were measured using a stereomicroscope and a computer-aided measuring system  
96 that based on a CCD system, with a measuring program system developed by the Institute of  
97 Environment and Sustainable Development in Agriculture, Chinese Academy of Agricultural  
98 Sciences (CAAS).

99

100 *Mitochondrial analysis*

101 Total DNA was extracted from the thorax muscle tissue of each individual from each colony.  
102 An mtDNA region that encompasses the tRNA ILE and part of the ND2 gene were amplified  
103 using the primer set: ILE: 5' -TGATAAAAGAAATATTTTGA -3'; and L1: 5'  
104 -GAATCTAATTAATAAAAAA -3'. The amplifications were carried out following the  
105 procedure in Arias and Sheppard (1996). PCR products sequenced on an ABI377 automated  
106 sequencer in the North Molecular Research Core Facility of Beijing Genomics Institute.

107

108 **References**

109 Ruttner F. 1988. Biogeography and taxonomy of honeybees. Berlin: Springer-Verlag.

110
